# Supplementary material for: A Burkholderia pseudomallei Outer Membrane Vesicle Vaccine Provides Cross Protection against Inhalational Glanders in Mice and Non-Human Primates
Source: MDPI journal article supplement (doi:10.3390/vaccines5040049), 2017-12-09
Supplement: s1 [file s1]

# 1 **A *Burkholderia pseudomallei* Outer Membrane** 2 **Vesicle Vaccine Provides Cross Protection against** 3 **Inhalational Glanders in Mice and Non-Human** 4 **Primates**

5 Sarah M. Baker, Christopher J. H. Davitt, Natalya Motyka, Nicole L. Kikendall, Kasi Russell-  
6 Lodrigue, Chad J. Roy, and Lisa A. Morici

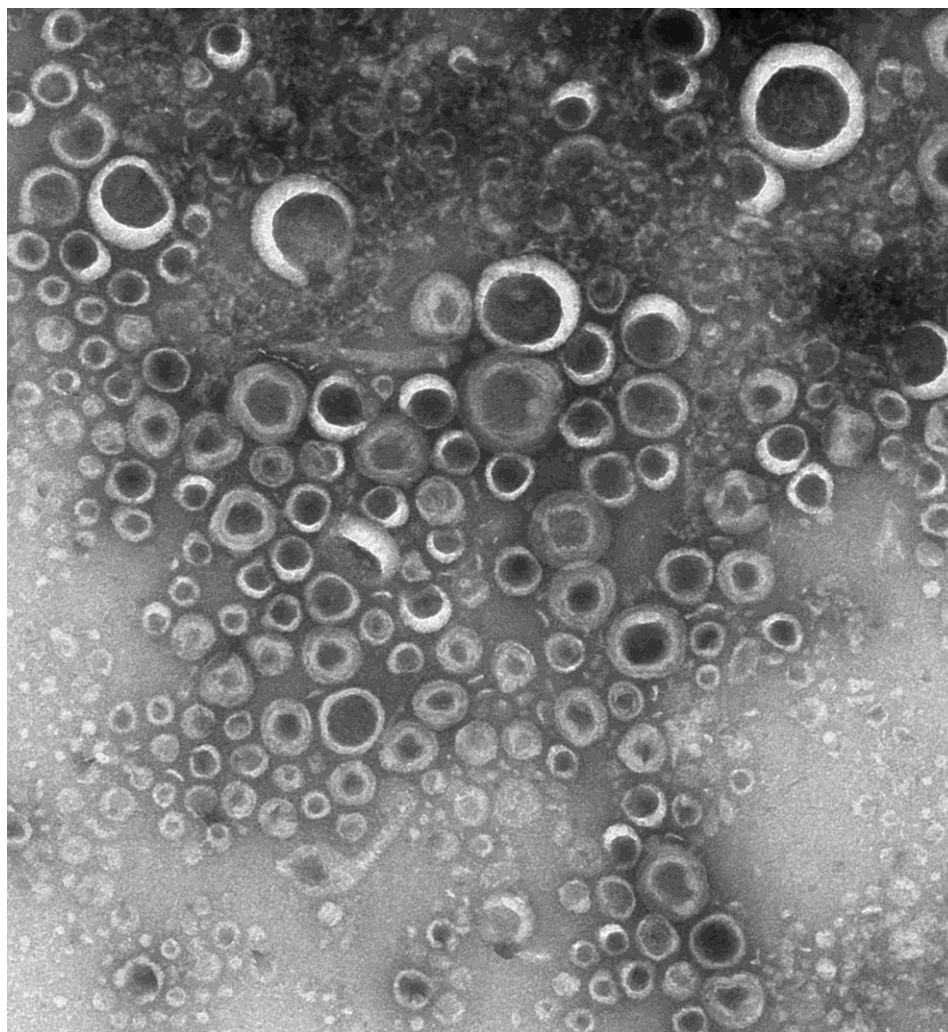

7  
8 **Figure S1.** OMVs purified from *B. pseudomallei* strain Bp82. Purified OMVs were negatively stained  
9 with 1% uranyl acetate and imaged by transmission electron microscopy. OMVs range between 25  
10 and 200 nm in diameter. Magnification 31,000x. Scale bar 200nm.

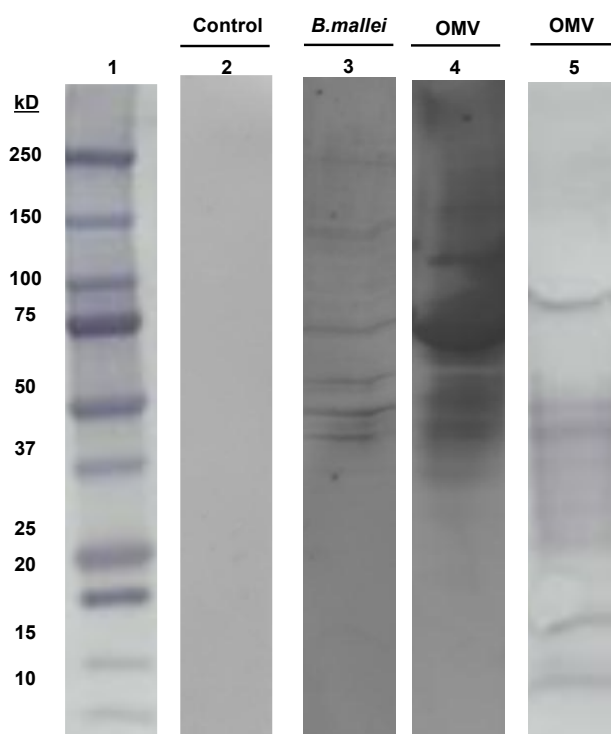

**Figure S2.** OMV immunization induces IgG antibodies against numerous *B. mallei* antigens. Western blot of *B. mallei* lysate (lanes 2 and 3) and OMV (lanes 4 and 5) preparations using pooled sera from sham-immunized (lane 2) or OMV immunized (lanes 3 and 4) mice (n=5 per group). OMV O-polysaccharide (OPS) in lane 5 was detected using a monoclonal antibody (Pp-Ps-W) to *B. pseudomallei* OPS to facilitate comparison of immunoreactive proteins versus OPS in *B. mallei* lysate probed with OMV immune sera. Lane 1 = molecular weight marker.

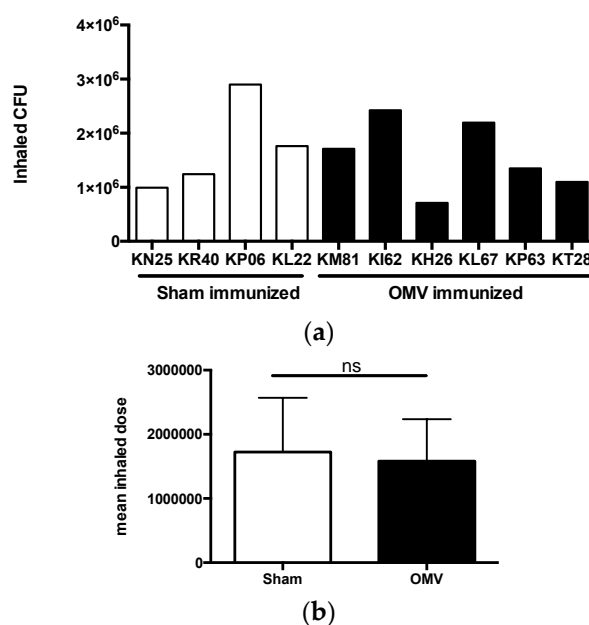

**Figure S3.** *B. mallei* aerosol challenge doses for rhesus macaques immunized with sham or OMV vaccine. **(a)** Inhaled doses of *B. mallei* were calculated for each macaque. Doses ranged from  $7.1 \times 10^5$  to  $2.9 \times 10^6$  cfu per animal. **(b)** Mean inhaled dose per immunization group. There was no difference in inhaled dose between sham immunized and OMV-immunized animals (ns = not significant, p=0.77 using students t-test).

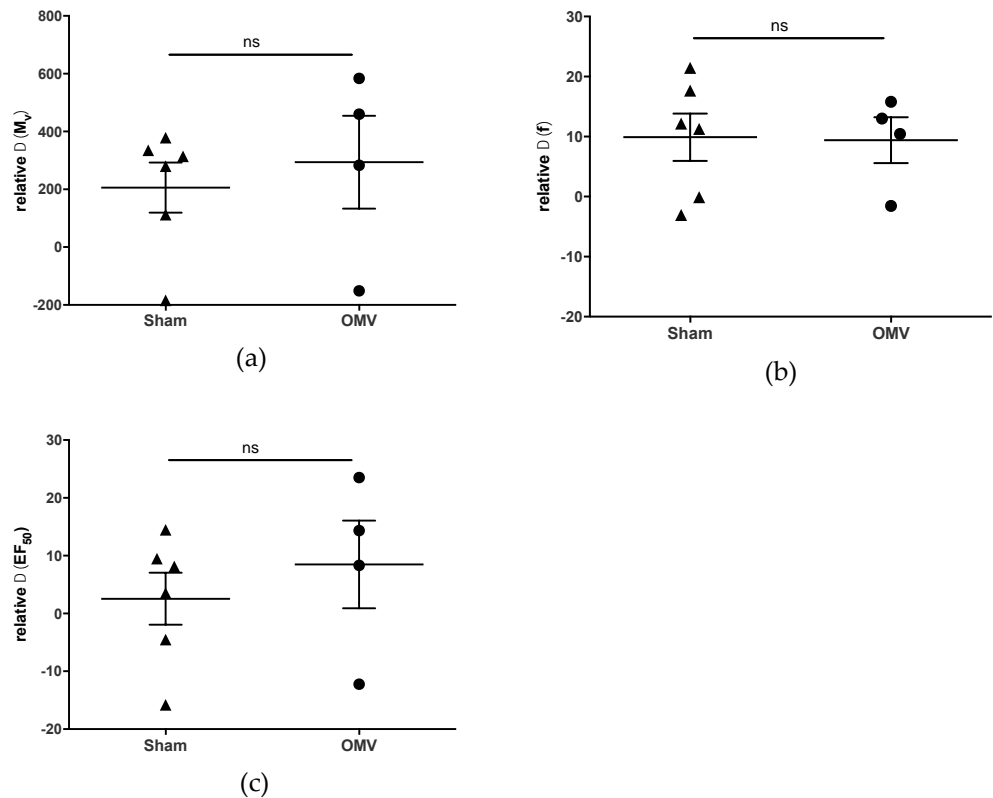

**Figure S4.** Changes in respiratory function after immunization and *B. mallei* challenge in nonhuman primates. Pulmonary function of rhesus macaques vaccinated with OMVs or saline (sham-vaccinated). Relative change ( $\Delta$ ) in each respiratory parameter prior to challenge when compared to measurement +7days after *B. mallei* aerosol challenge. (a) Minute volume (ml/minute); (b) frequency (breaths/min); (c)  $EF_{50}$  (ml/sec). Group comparison by Kolmogorov-Smirnov test, ns= not significant at  $p<0.05$ .
